# Supplementary material for: Cancer exosomes induce tumor innervation
Source: PubMed Central journal article supplement (PMC6191452; doi:10.1038/s41467-018-06640-0), 2018-10-16
Supplement: 41467_2018_6640_MOESM1_ESM.pdf [file 41467_2018_6640_MOESM1_ESM.pdf]

Cancer exosomes induce tumor innervation

Madeo et al.

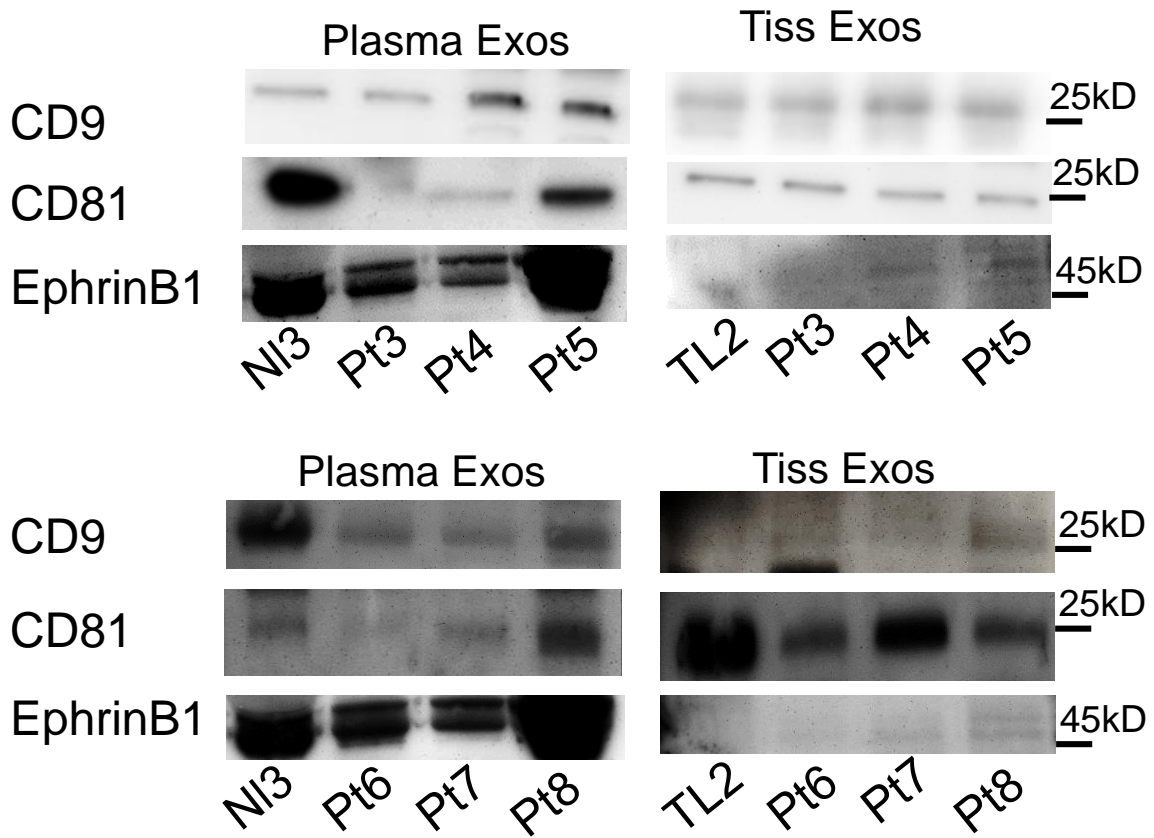

**Supplementary Figure 1.** Western blot analysis of human exosomes. Western blot analysis of exosomes (Exos) from human control (NI), patient (Pt) plasma or matched tumor tissue. Control tissue is tonsil (TL). n=3 technical replicates with representative western blots shown.

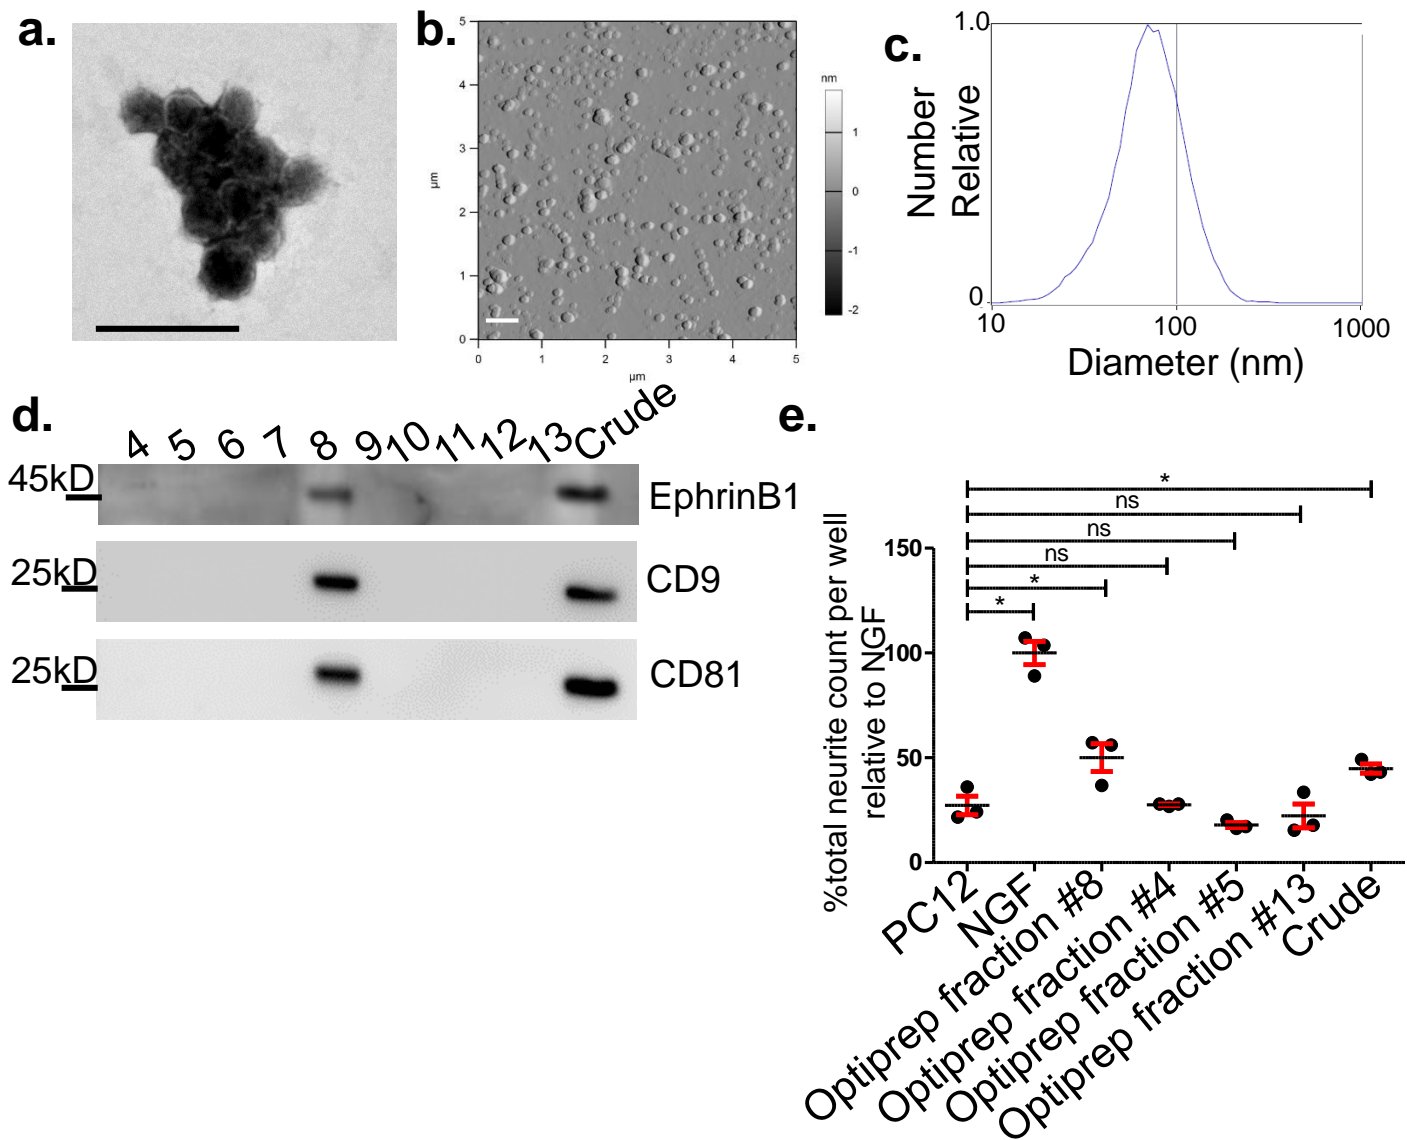

**Supplementary Figure 2.** Validation of mEERL exosome purification. A) Scanning electron micrograph of exosomes purified from mEERL parental conditioned media. Scale bar, 250 nm. n= 3 biological replicates. B) Atomic force microscopy amplitude trace of mEERL parental exosomes. Size range: 62-144 nm. Scale bar, 500 nm. n= 2 biological replicates. C) Nanoparticle tracking analysis showing size distribution of mEERL parental exosomes. n= 4 biological samples. D) Western blot analysis of mEERL *EphrinB1* exosomes purified by differential ultracentrifugation alone ("crude") or with optiprep density gradient centrifugation (fractions 4-13). n= 3 biological replicates. Experiment repeated n=2 times. E) Neurite outgrowth of exosomes from optiprep fractions 4, 5, 8, 13 and "crude" exosomes. NGF (100ng/ml) treatment serves as control. n=3 replicates/condition; experiment repeated twice. Statistical analysis by one-way ANOVA with post hoc Fisher's Least Significant Difference (LSD) test. LSD p values reported; \*, p< 0.01; ns, not significant. All comparisons, LSD and Benjamini-Hochberg p values found in Supplemental Table 7. The variance between the groups statistically compared is similar. Central value used was the mean. Error bars, standard deviation.

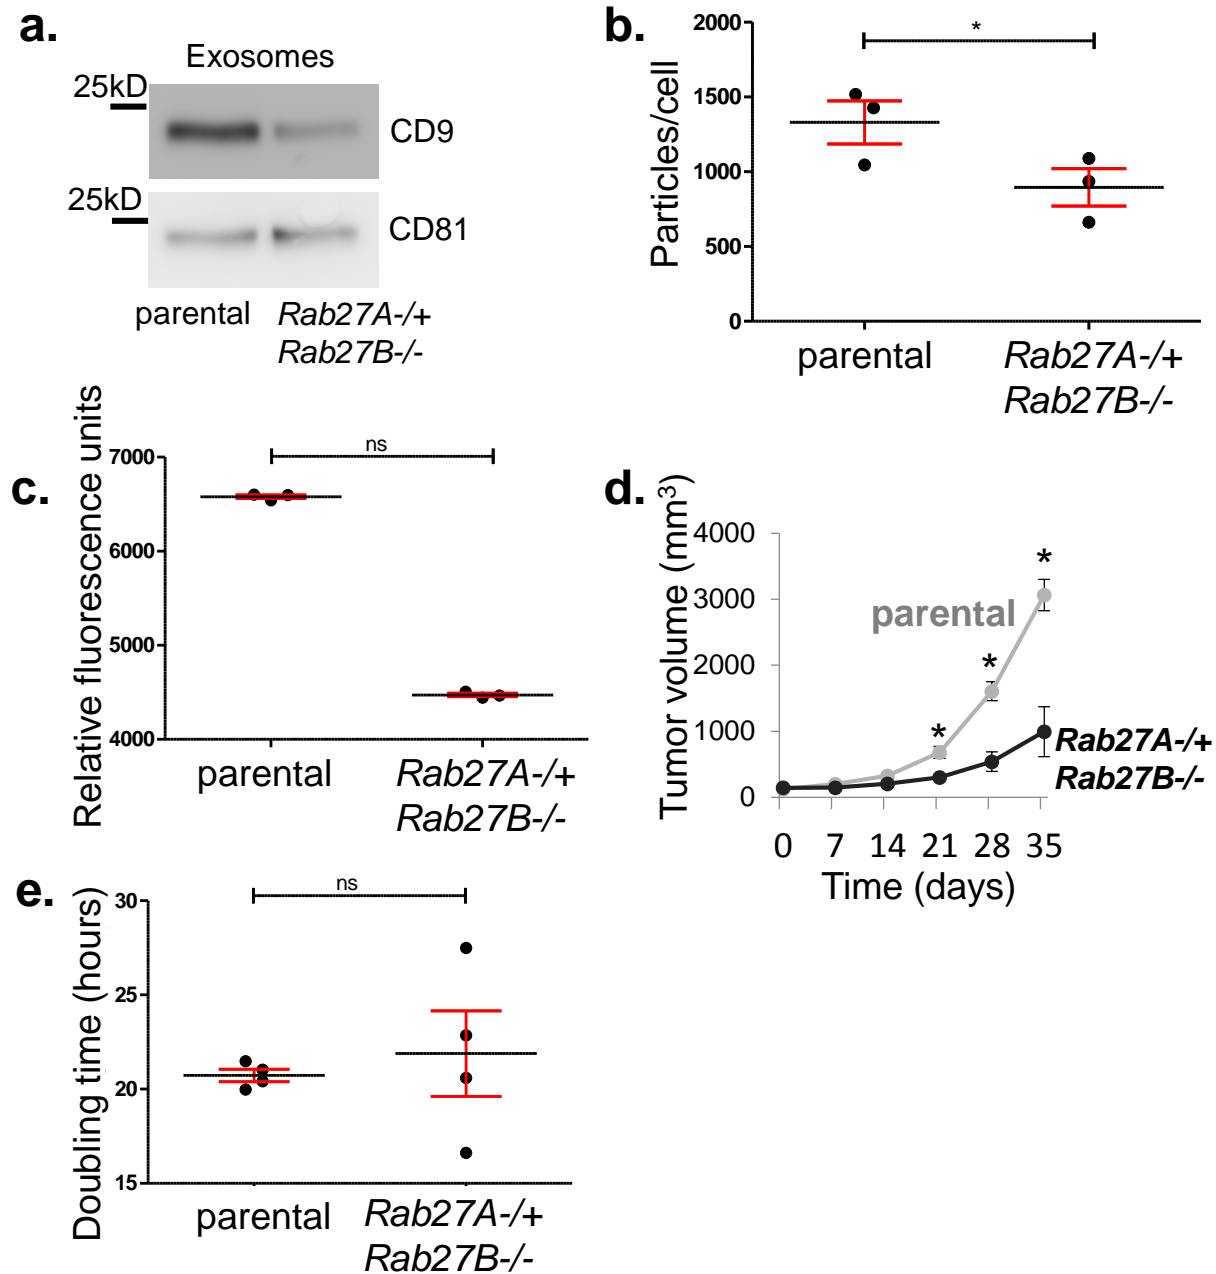

**Supplementary Figure 3.** mEERL tumors compromised in *Rab27A/B* have decreased exosome release. A) Western blot analysis of exosomes from the indicated sources; n=4 biological replicates. Exosomes were normalized to producing cell number. B) Exosome number by nanoparticle tracking analysis. Exosomes normalized to producing cell number; n=3 biological replicates. Statistical analysis by one-tailed student's t-test; \*, p= 0.04. The variance between the groups statistically compared is similar. C) Representative relative fluorescence units of CFDA-SE labeled exosomes with technical replicates. Experiment was repeated n=4 times with biological replicates and generated similar results. Non-parametric test for significance indicates no difference in the means. ns, not significant. D) Tumor growth curves of mice implanted with mEERL parental (gray) or mEERL *Rab27A*<sup>-/-</sup>*27B*<sup>-/-</sup> (black) tumors. n=7 mice/condition. Experiment performed one time. Statistical analysis by two-tailed student's t-test; \*, p< 0.002. The variance between groups that compared is similar. E) Proliferation assay of the indicated cell lines, n=4 biological replicates with similar results. Statistical analysis by one-tailed student's t-test. The variance between the groups statistically compared is similar; ns, not significant. All error bars are standard error of the mean.

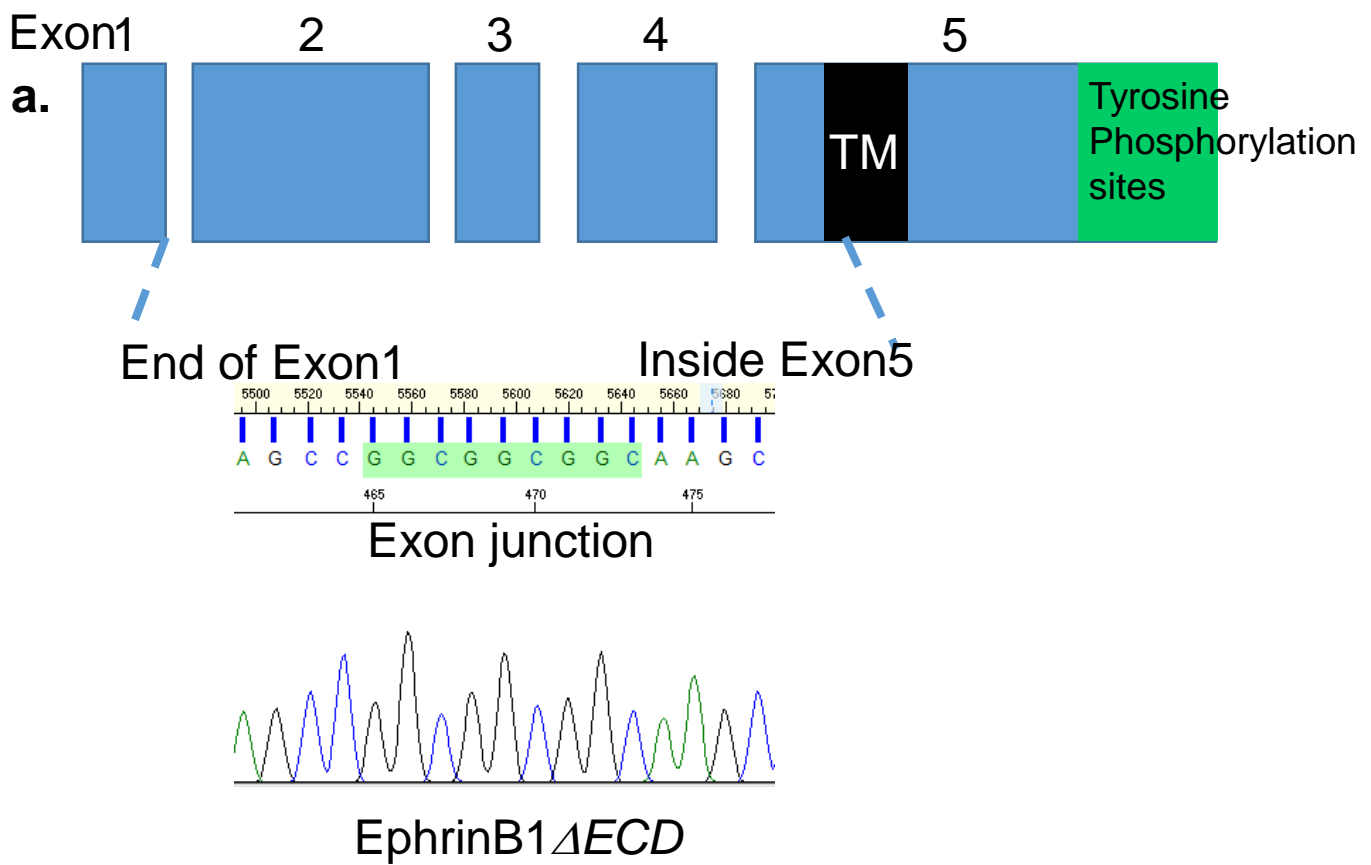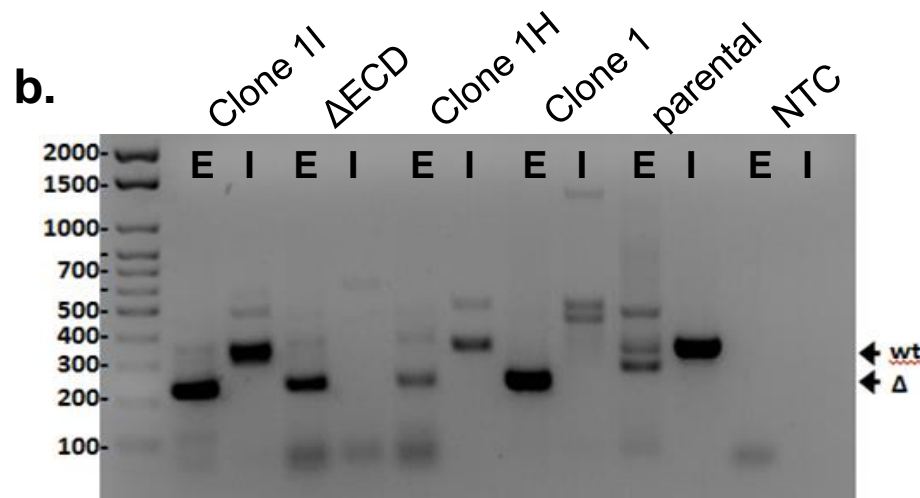

**Supplementary Figure 4.** Validation of mEERL *EphrinB1* $\Delta$ ECD. A) Schematic of EphrinB1 exons showing the deletion in the *EphrinB1* $\Delta$ ECD clone (dotted lines) which results in a junction between the end of exon 1 and within exon 5 (Exon Junction). The majority of the transmembrane domain (TM) domain is retained. Electropherogram of the exon junction is shown. B) PCR analysis of EphrinB1 CRISPR clones using external (E) and internal (I) primers. This CRISPR strategy leads to loss of amplification with internal probes when successful. Clones that lack amplification with internal primers were chosen for further validation; the mEERL *EphrinB1* $\Delta$ ECD ( $\Delta$ ECD) clone was thus further validated. NTC, no template control. N= 3 biological replicates with similar results.

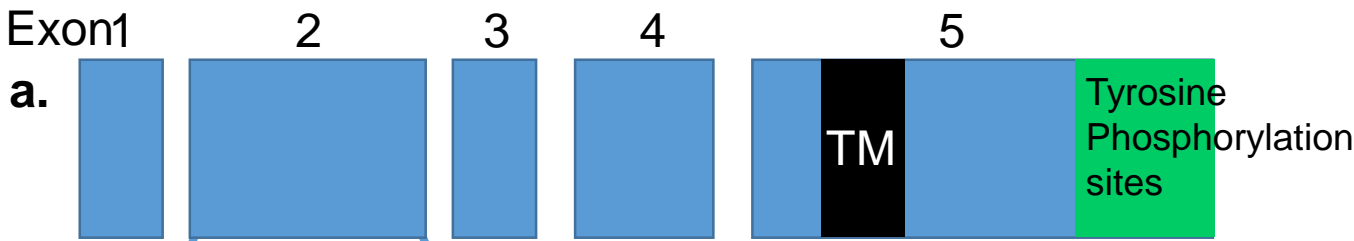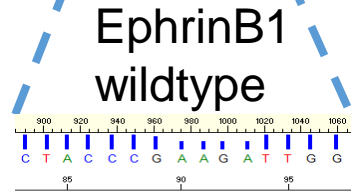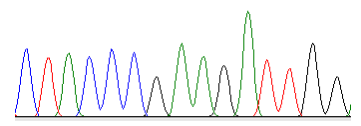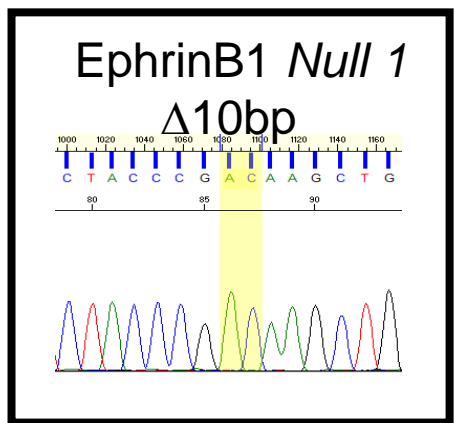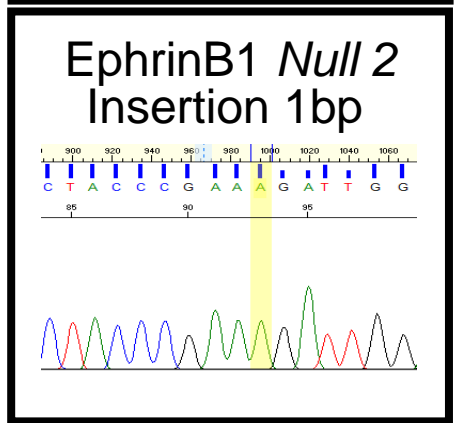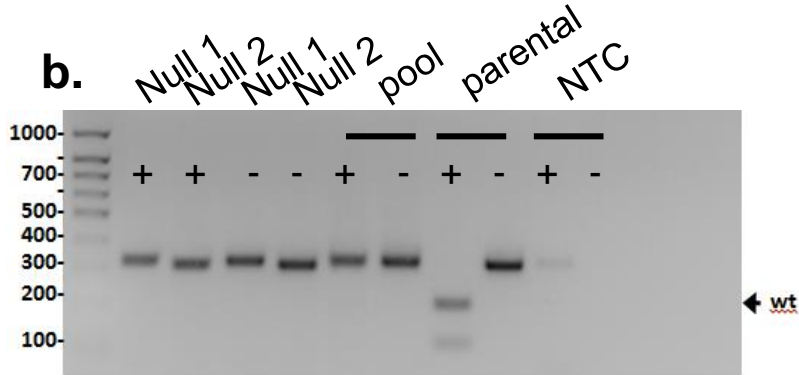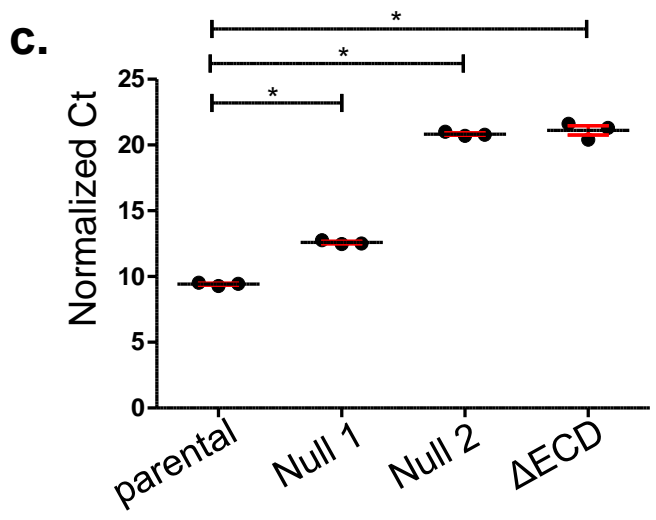

**Supplementary Figure 5.** Validation of mEERL EphrinB1 CRISPR *Null 1* and *Null 2*. A) Schematic of EphrinB1 exons and electropherograms of clones showing the alterations within exon 2 that generated the *Null 1* and *Null 2* clones which result in no EphrinB1 expression. The electropherogram for full length, wildtype EphrinB1 is also shown. B) This CRISPR strategy results in destruction of a restriction site if successful. mEERL parental cells served as a positive control. +, with restriction enzyme, -, without restriction enzyme. Pool refers to all clones pooled together. NTC, no template control. Wt, wildtype. C) Quantitative RT-PCR for EphrinB1 of CRISPR clones. Data normalized to beta actin. mEERL parental cells (parental) served as a positive control. Clones X, *Null 1*, *Null 2* and  $\Delta\text{ECD}$  were tested. N=3 biological replicates with similar results. Error bars, standard deviation.

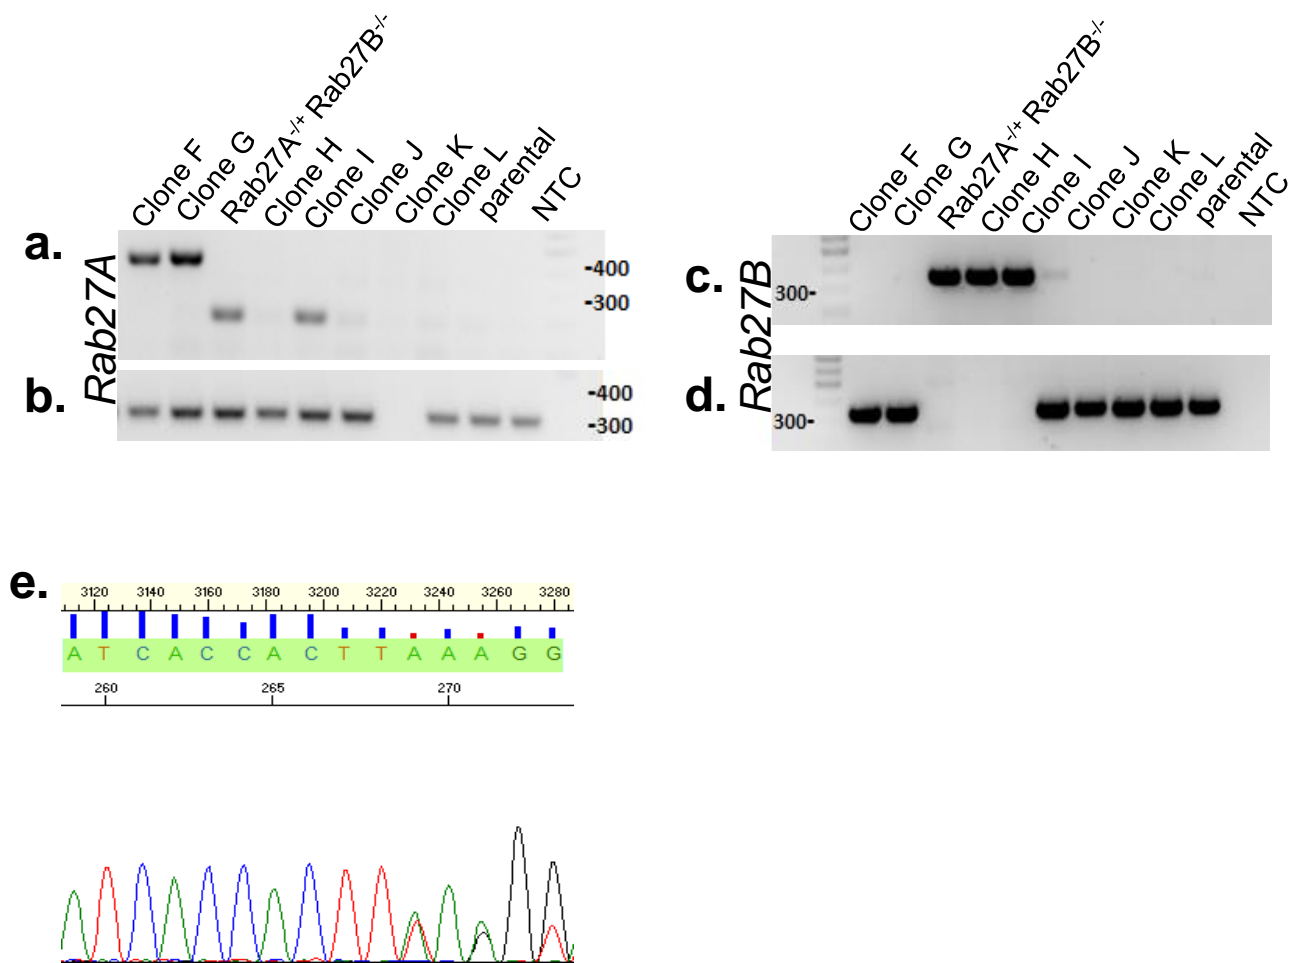

**Supplementary Figure 6.** Validation of mEERL *Rab27A*<sup>+/+</sup> *Rab27B*<sup>-/-</sup>. Clones were screened using PCR primers distal to (A, C) or within (B, D) the expected regions of genomic deletion of *Rab27A* (A, B) and *Rab27B* (C, D). Clone *Rab27A*<sup>+/+</sup> *Rab27B*<sup>-/-</sup> exhibited a larger than expected truncation of one *Rab27A* allele (A) but retained one wt allele (B) while *Rab27B* showed the predicted deletion product (C) and lack of wt template (D). n=3 biological replicates. E) Electropherogram from the mEERL *Rab27A*<sup>+/+</sup> *Rab27B*<sup>-/-</sup> clone showing different repair mechanisms in the form of double peaks.

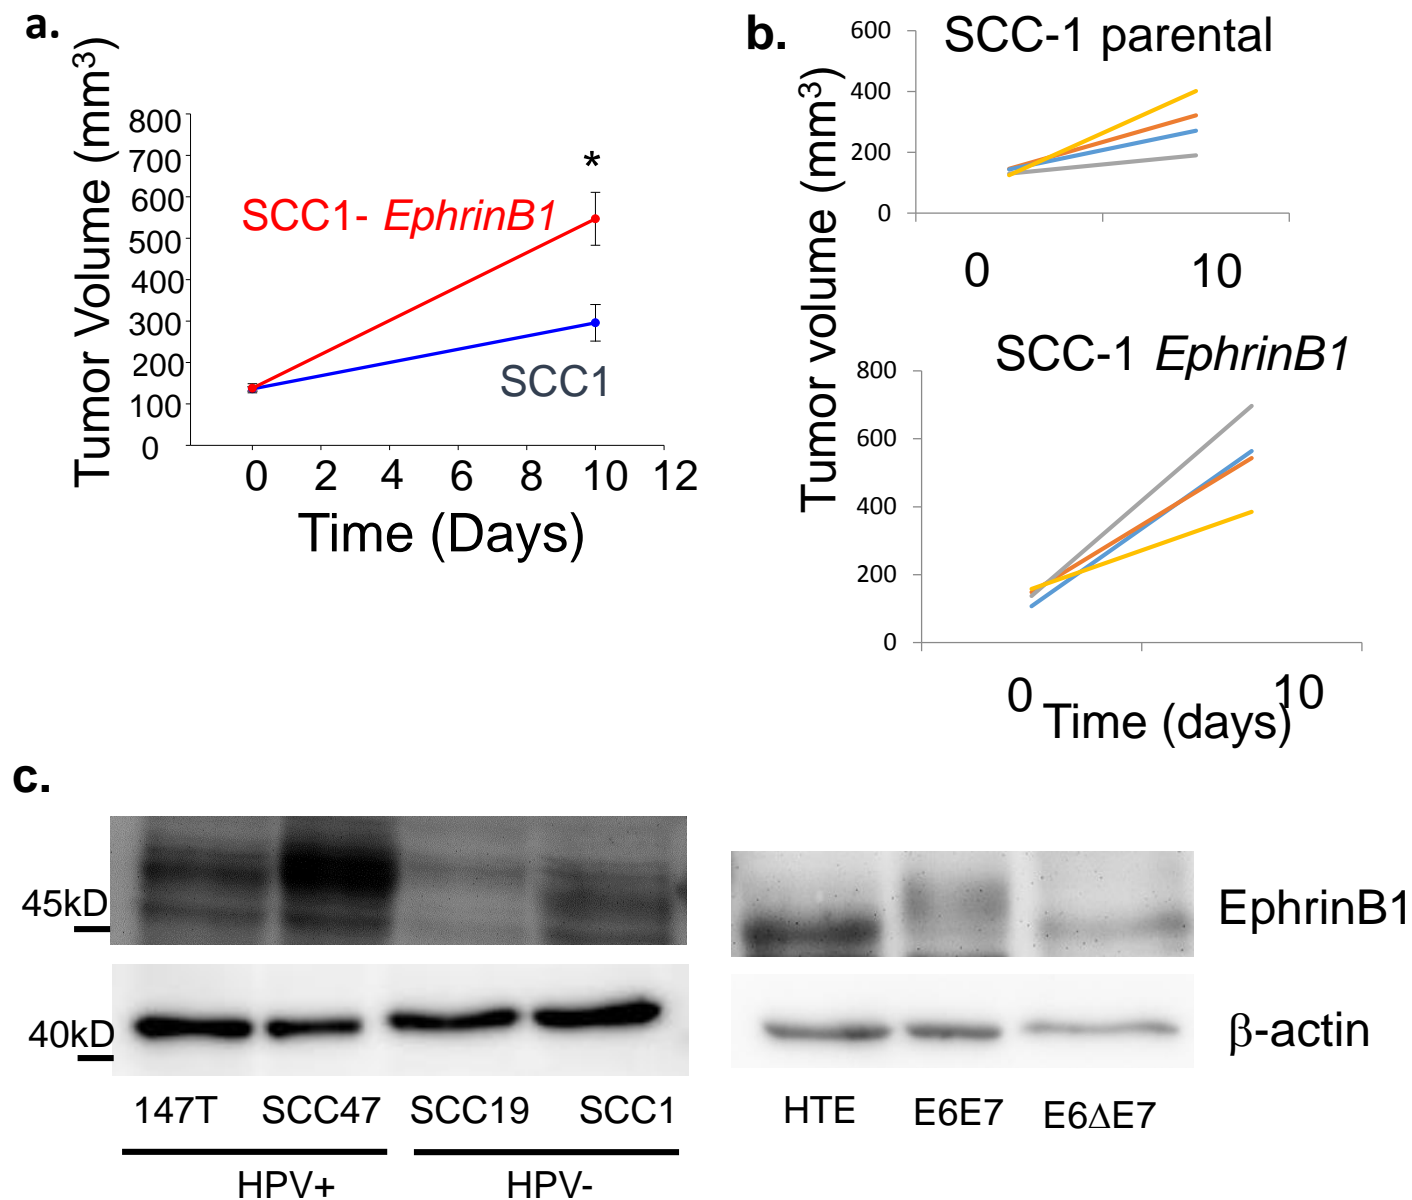

**Supplementary Figure 7.** EphrinB1 and tumor growth. A) Average tumor growth curves from mice ( $n=4/\text{group}$ ) bearing SCC1 parental (blue line) or SCC1-*EphrinB1* (red line) tumors. Statistical test by two-tailed student's t-test; \*,  $p=0.009$ . The variance between groups compared is similar. Experiment performed one time. Central value used was the mean. Error bars are standard error of the mean. B) Individual tumor growth curves for mice in experiment in panel B. Each line represents one mouse. C) Western blot analysis of whole cell lysate from the indicated human cell lines.



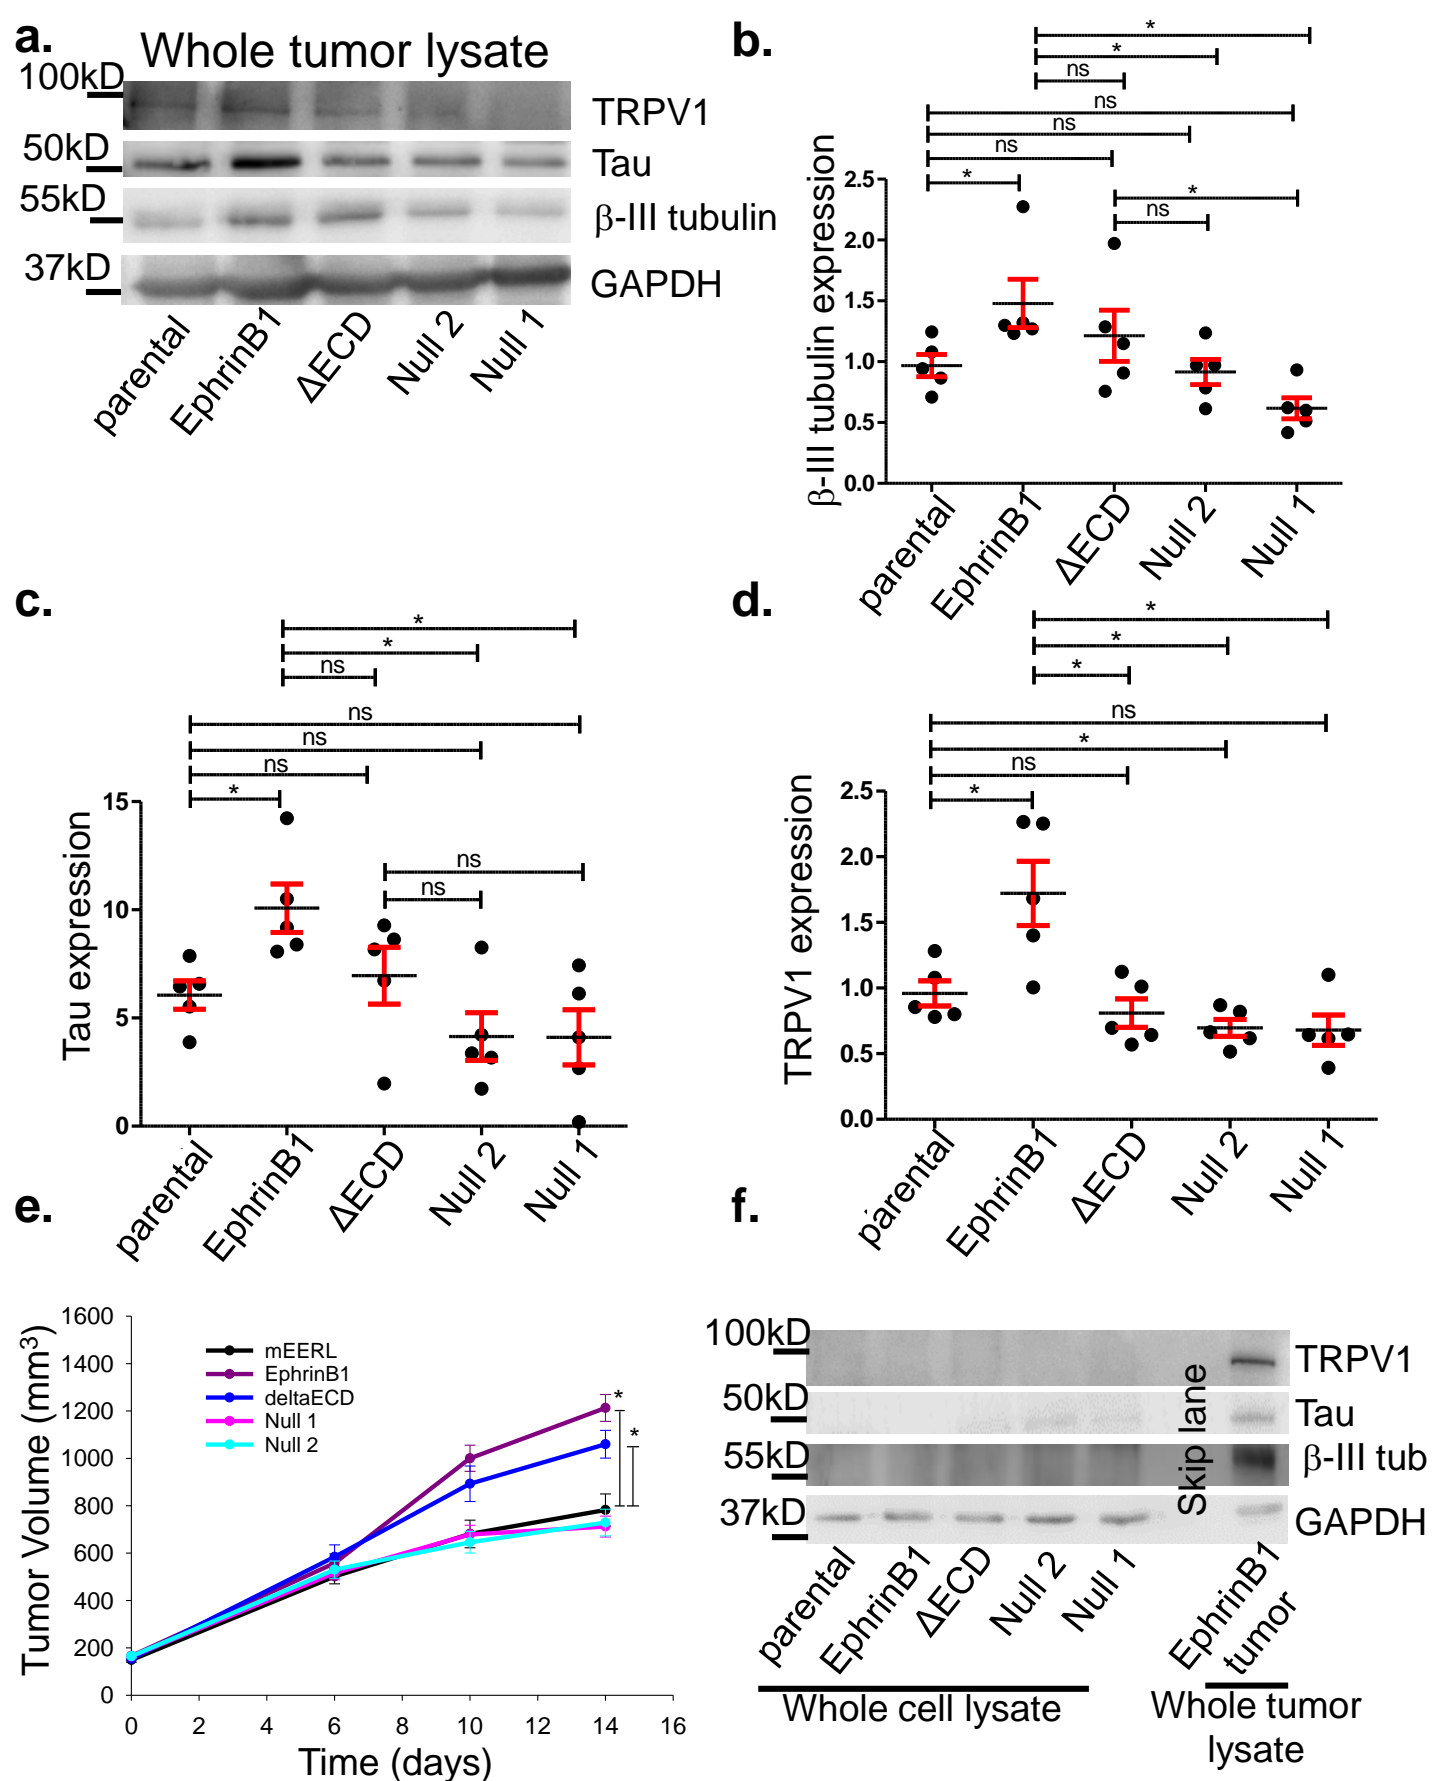

**Supplementary Figure 8**

**Supplementary Figure 8.** Increased EphrinB1 tumor expression potentiates tumor innervation *in vivo*. A) Western blot analysis of whole tumor lysates. Signals were normalized to GAPDH and densitometry was used to quantify innervation by: B)  $\beta$ -III tubulin, C) Tau and D) TRPV1 expression. n=5 tumors/condition were analyzed (i.e. 5 tumors/group were analyzed on 5 western blots, one representative western blot shown). Statistical analysis by one-way ANOVA with post hoc Fisher's Least Significant Difference (LSD) test; LSD p values reported; \*,  $p < 0.03$ ; ns, not significant. The variance between the groups statistically compared is similar. Central value used was the mean. n= 5 biological replicates/condition; experiment repeated two times. Error bars, standard deviation. All comparisons and LSD p values found in Supplemental Table 7 and 8. E) Tumor growth curves of mice (n=10 mice/group) bearing the indicated mEERL tumors. Statistical analysis by student's t-test; \*,  $p < 0.01$ . Error bars are SEM. The variance between the groups statistically compared is similar. Central value used was the mean. F) Western blot analysis of whole cell lysates from the indicated cell lines and whole tumor lysate from mEERL *EphrinB1* tumor.

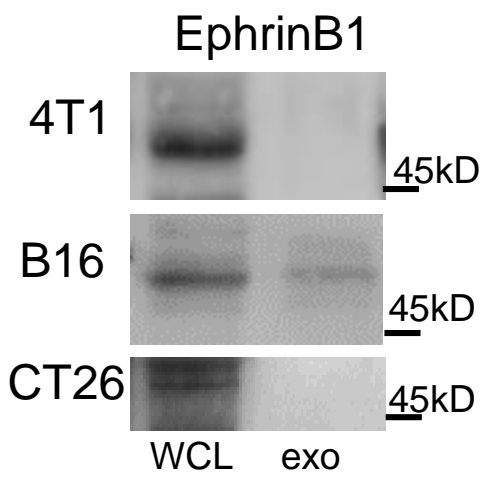

**Supplementary Figure 9.**  
Western blot analysis of whole cell lysate (WCL) and exosomes (exo) purified from the indicated cell lines.

Supplementary Table 1: Comparisons and LSD p values

| Figure              | comparisons            | LSD p value  |          |
|---------------------|------------------------|--------------|----------|
| Figure 3A Top Panel | PC12 vs. NGF           | 0.0058       |          |
|                     | PC12 vs. NI1           | 0.3713       |          |
|                     | PC12 vs. NI2           | 0.7033       |          |
|                     | PC12 vs. Pt1           | 0.0045       |          |
|                     | PC12 vs. Pt2           | 0.0044       |          |
|                     | NGF vs. NI1            | 0.0183       |          |
|                     | NGF vs. NI2            | 0.0092       |          |
|                     | NGF vs. Pt1            | 0.8199       |          |
|                     | NGF vs. Pt2            | 0.8106       |          |
|                     | NI1 vs. NI2            | 0.5916       |          |
|                     | NI1 vs. Pt1            | 0.0136       |          |
|                     | NI1 vs. Pt2            | 0.0134       |          |
|                     | NI2 vs. Pt1            | 0.007        |          |
|                     | NI2 vs. Pt2            | 0.0069       |          |
|                     | Pt1 vs. Pt2            | 0.9904       |          |
|                     |                        |              |          |
|                     | Figure 3A Middle Panel | PC12 vs. NGF | < 0.0001 |
| PC12 vs. NI1        |                        | 0.4042       |          |
| PC12 vs. NI2        |                        | 0.537        |          |
| PC12 vs. NI3        |                        | 0.1364       |          |
| PC12 vs. Pt3        |                        | 0.0009       |          |
| PC12 vs. Pt4        |                        | 0.0314       |          |
| PC12 vs. Pt5        |                        | 0.0114       |          |
| NGF vs. NI1         |                        | < 0.0001     |          |
| NGF vs. NI2         |                        | < 0.0001     |          |
| NGF vs. NI3         |                        | < 0.0001     |          |
| NGF vs. Pt3         |                        | 0.0004       |          |
| NGF vs. Pt4         |                        | < 0.0001     |          |
| NGF vs. Pt5         |                        | < 0.0001     |          |
| NI1 vs. NI2         |                        | 0.8244       |          |
| NI1 vs. NI3         |                        | 0.4887       |          |
| NI1 vs. Pt3         |                        | 0.006        |          |
| NI1 vs. Pt4         |                        | 0.1545       |          |
| NI1 vs. Pt5         |                        | 0.0643       |          |
| NI2 vs. NI3         |                        | 0.3638       |          |
| NI2 vs. Pt3         |                        | 0.0037       |          |
| NI2 vs. Pt4         |                        | 0.1044       |          |
| NI2 vs. Pt5         |                        | 0.0416       |          |
| NI3 vs. Pt3         |                        | 0.0265       |          |
| NI3 vs. Pt4         |                        | 0.4448       |          |
| NI3 vs. Pt5         |                        | 0.2208       |          |
| Pt3 vs. Pt4         |                        | 0.1179       |          |
| Pt3 vs. Pt5         |                        | 0.2627       |          |
| Pt4 vs. Pt5         | 0.6314                 |              |          |

Supplementary Table 2: Comparisons and LSD p values

| Figure                 | comparisons         | LSD p value  |        |
|------------------------|---------------------|--------------|--------|
| Figure 3A Bottom Panel | NGF vs. PC12        | < 0.0001     |        |
|                        | NGF vs. NI1         | < 0.0001     |        |
|                        | NGF vs. NI2         | < 0.0001     |        |
|                        | NGF vs. NI3         | < 0.0001     |        |
|                        | NGF vs. Pt6         | 0.0019       |        |
|                        | NGF vs. Pt7         | 0.0002       |        |
|                        | NGF vs. Pt8         | 0.0001       |        |
|                        | PC12 vs. NI1        | 0.4027       |        |
|                        | PC12 vs. NI2        | 0.5356       |        |
|                        | PC12 vs. NI3        | 0.1352       |        |
|                        | PC12 vs. Pt6        | 0.0002       |        |
|                        | PC12 vs. Pt7        | 0.0022       |        |
|                        | PC12 vs. Pt8d       | 0.0026       |        |
|                        | NI1 vs. NI2         | 0.8239       |        |
|                        | NI1 vs. NI3         | 0.4873       |        |
|                        | NI1 vs. Pt6         | 0.0013       |        |
|                        | NI1 vs. Pt7         | 0.0137       |        |
|                        | NI1 vs. Pt8         | 0.0164       |        |
|                        | NI2 vs. NI3         | 0.3623       |        |
|                        | NI2 vs. pt6         | 0.0008       |        |
|                        | NI2 vs. Pt7         | 0.0085       |        |
|                        | NI2 vs. Pt8         | 0.0102       |        |
|                        | NI3 vs. Pt6         | 0.006        |        |
|                        | NI3 vs. Pt7         | 0.0572       |        |
|                        | NI3 vs. Pt8         | 0.0676       |        |
|                        | Pt6 vs. Pt7         | 0.2862       |        |
|                        | Pt6 vs. Pt8         | 0.2505       |        |
|                        | Pt7 vs. Pt8         | 0.9305       |        |
|                        |                     |              |        |
|                        | Figure 3B Top panel | PC12 vs. NGF | 0.0017 |
| PC12 vs. Pt1           |                     | 0.0002       |        |
| PC12 vs. Pt2           |                     | 0.001        |        |
| NGF vs. Pt1            |                     | 0.0063       |        |
| NGF vs. Pt2            |                     | 0.2685       |        |
|                        | Pt1 vs. Pt2         | 0.0164       |        |

Supplementary Table 3: Comparisons and LSD p values

| Figure                 | comparisons  | LSD p value |
|------------------------|--------------|-------------|
| Figure 3B Middle panel | NGF vs. PC12 | < 0.0001    |
|                        | NGF vs. TL2  | < 0.0001    |
|                        | NGF vs. Pt3  | < 0.0001    |
|                        | NGF vs. Pt4  | < 0.0001    |
|                        | NGF vs. Pt5  | < 0.0001    |
|                        | PC12 vs. TL2 | 0.2904      |
|                        | PC12 vs. Pt3 | 0.0216      |
|                        | PC12 vs. Pt4 | 0.0292      |
|                        | PC12 vs. Pt5 | 0.0071      |
|                        | TL2 vs. Pt3  | 0.1511      |
|                        | TL2 vs. Pt4  | 0.1958      |
|                        | TL2 vs. Pt5  | 0.0545      |
|                        | Pt3 vs. Pt4  | 0.8729      |
|                        | Pt3 vs. Pt5  | 0.5616      |
|                        | Pt4 vs. Pt5  | 0.4617      |
|                        |              |             |
| Figure 3B Bottom panel | PC12 vs. NGF | < 0.0001    |
|                        | PC12 vs. TL2 | 0.0001      |
|                        | PC12 vs. Pt6 | < 0.0001    |
|                        | PC12 vs. Pt7 | < 0.0001    |
|                        | PC12 vs. Pt8 | < 0.0001    |
|                        | NGF vs. TL2  | < 0.0001    |
|                        | NGF vs. Pt6  | 0.9967      |
|                        | NGF vs. Pt7  | 0.3217      |
|                        | NGF vs. Pt8  | 0.0172      |
|                        | TL2 vs. Pt6  | < 0.0001    |
|                        | TL2 vs. Pt7  | 0.0001      |
|                        | TL2 vs. Pt8  | 0.0027      |
|                        | Pt6 vs. Pt7  | 0.351       |
|                        | Pt6 vs. Pt8  | 0.0239      |
|                        | Pt7 vs. Pt8  | 0.1393      |

Supplementary Table 4: Comparisons and LSD p values

| Figure    | comparisons                             | LSD p value |
|-----------|-----------------------------------------|-------------|
| Figure 5A | PC12 vs. NGF                            | < 0.0001    |
|           | PC12 vs. parental                       | 0.0001      |
|           | PC12 vs. Rab27A/B                       | 0.0115      |
|           | NGF vs. parental                        | 0.0195      |
|           | NGF vs. Rab27A/B                        | 0.0001      |
|           | parental vs. Rab27A/B                   | 0.005       |
|           |                                         |             |
| Figure 6A | Antibody:NGF vs. Antibody:Parental      | 0.3745      |
|           | Antibody:NGF vs. Antibody:EphrinB1      | 0.0009      |
|           | Antibody:NGF vs. NoAb:NGF               | 0.0019      |
|           | Antibody:NGF vs. NoAb:Parental          | 0.4863      |
|           | Antibody:NGF vs. NoAb:EphrinB1          | 0.0015      |
|           | Antibody:Parental vs. Antibody:EphrinB1 | 0.0047      |
|           | Antibody:Parental vs. NoAb:NGF          | 0.0102      |
|           | Antibody:Parental vs. NoAb:Parental     | 0.8417      |
|           | Antibody:Parental vs. NoAb:EphrinB1     | 0.0082      |
|           | Antibody:EphrinB1 vs. NoAb:NGF          | 0.6865      |
|           | Antibody:EphrinB1 vs. NoAb:Parental     | 0.0033      |
|           | Antibody:EphrinB1 vs. NoAb:EphrinB1     | 0.7739      |
|           | NoAb:NGF vs. NoAb:Parental              | 0.007       |
|           | NoAb:NGF vs. NoAb:EphrinB1              | 0.9067      |
|           | NoAb:Parental vs. NoAb:EphrinB1         | 0.0056      |

Supplementary Table 5: Comparisons and LSD p values

| Figure    | comparisons                | LSD p value |
|-----------|----------------------------|-------------|
| Figure 6C | PC12 vs. NGF               | < 0.0001    |
|           | PC12 vs. parental          | 0.0038      |
|           | PC12 vs. EphrinB1          | < 0.0001    |
|           | PC12 vs. EphrinB1 DECD     | 0.092       |
|           | PC12 vs. null 1            | 0.0145      |
|           | PC12 vs. null 2            | 0.0011      |
|           | NGF vs. parental           | < 0.0001    |
|           | NGF vs. EphrinB1           | 0.0054      |
|           | NGF vs. EphrinB1 DECD      | < 0.0001    |
|           | NGF vs. null 1             | < 0.0001    |
|           | NGF vs. null 2             | < 0.0001    |
|           | parental vs. EphrinB1      | 0.0004      |
|           | parental vs. EphrinB1 DECD | 0.1676      |
|           | parental vs. null 1        | 0.5824      |
|           | parental vs. null 2        | 0.639       |
|           | EphrinB1 vs. EphrinB1 DECD | < 0.0001    |
|           | EphrinB1 vs. null 1        | < 0.0001    |
|           | EphrinB1 vs. null 2        | 0.0015      |
|           | EphrinB1 DECD vs. null 1   | 0.3968      |
|           | EphrinB1 DECD vs. null 2   | 0.069       |
|           | null 1 vs. null 2          | 0.3116      |
|           |                            |             |
| Figure 7A | PC12 vs. NGF               | < 0.0001    |
|           | PC12 vs. SCC1 (-)          | 0.0253      |
|           | PC12 vs. SCC19 (-)         | 0.0016      |
|           | PC12 vs. 147T (+)          | < 0.0001    |
|           | PC12 vs. SCC47 (+)         | < 0.0001    |
|           | NGF vs. SCC1 (-)           | < 0.0001    |
|           | NGF vs. SCC19 (-)          | < 0.0001    |
|           | NGF vs. 147T (+)           | < 0.0001    |
|           | NGF vs. SCC47 (+)          | < 0.0001    |
|           | SCC1 (-) vs. SCC19 (-)     | 0.1618      |
|           | SCC1 (-) vs. 147T (+)      | < 0.0001    |
|           | SCC1 (-) vs. SCC47 (+)     | < 0.0001    |
|           | SCC19 (-) vs. 147T (+)     | 0.0003      |
|           | SCC19 (-) vs. SCC47 (+)    | < 0.0001    |
|           | 147T (+) vs. SCC47 (+)     | 0.0021      |



Supplementary Table 6: Comparisons and LSD p values

| Figure    | comparisons                 | LSD p value |
|-----------|-----------------------------|-------------|
| Figure 7B | PC12 vs. NGF                | < 0.0001    |
|           | PC12 vs. SCC1 (-)           | 0.0221      |
|           | PC12 vs. SCC1-EphrinB1      | 0.0001      |
|           | NGF vs. SCC1 (-)            | < 0.0001    |
|           | NGF vs. SCC1-EphrinB1       | < 0.0001    |
|           | SCC1 (-) vs. SCC1-EphrinB1  | 0.0031      |
|           |                             |             |
| Figure 7G | PC12 vs. NGF                | < 0.0001    |
|           | PC12 vs. HTE                | 0.2314      |
|           | PC12 vs. HTE E6E7           | < 0.0001    |
|           | PC12 vs. HTE E6delta/E7     | 0.0559      |
|           | NGF vs. HTE                 | < 0.0001    |
|           | NGF vs. HTE E6E7            | < 0.0001    |
|           | NGF vs. HTE E6delta/E7      | < 0.0001    |
|           | HTE vs. HTE E6E7            | < 0.0001    |
|           | HTE vs. HTE E6delta/E7      | 0.3951      |
|           | HTE E6E7 vs. HTE E6delta/E7 | 0.0002      |
|           |                             |             |
|           |                             |             |
| Figure 8B | NGF vs. PC12                | 0.0017      |
|           | NGF vs. CT26                | 0.2579      |
|           | NGF vs. B16                 | 0.3318      |
|           | NGF vs. 4T1                 | 0.2963      |
|           | PC12 vs. CT26               | 0.0125      |
|           | PC12 vs. B16                | 0.0004      |
|           | PC12 vs. 4T1                | 0.0106      |
|           | CT26 vs. B16                | 0.0507      |
|           | CT26 vs. 4T1                | 0.924       |
|           | B16 vs. 4T1                 | 0.0598      |

Supplementary Table 7: Comparisons and LSD p values

| Figure          | comparisons                                    | LSD p value |
|-----------------|------------------------------------------------|-------------|
| Suppl Figure 2E | PC12 vs. NGF                                   | < 0.0001    |
|                 | PC12 vs. optiprep fraction #8                  | 0.0025      |
|                 | PC12 vs. optiprep fraction #4                  | 0.9669      |
|                 | PC12 vs. optiprep fraction #5                  | 0.1486      |
|                 | PC12 vs. optiprep fraction #13                 | 0.4279      |
|                 | PC12 vs. Crude EVs                             | 0.013       |
|                 | NGF vs. optiprep fraction #8                   | < 0.0001    |
|                 | NGF vs. optiprep fraction #4                   | < 0.0001    |
|                 | NGF vs. optiprep fraction #5                   | < 0.0001    |
|                 | NGF vs. optiprep fraction #13                  | < 0.0001    |
|                 | NGF vs. Crude EVs                              | < 0.0001    |
|                 | optiprep fraction #8 vs. optiprep fraction #4  | 0.0027      |
|                 | optiprep fraction #8 vs. optiprep fraction #5  | 0.0001      |
|                 | optiprep fraction #8 vs. optiprep fraction #13 | 0.0005      |
|                 | optiprep fraction #8 vs. Crude EVs             | 0.4156      |
|                 | optiprep fraction #4 vs. optiprep fraction #5  | 0.1385      |
|                 | optiprep fraction #4 vs. optiprep fraction #13 | 0.405       |
|                 | optiprep fraction #4 vs. Crude EVs             | 0.0141      |
|                 | optiprep fraction #5 vs. optiprep fraction #13 | 0.488       |
|                 | optiprep fraction #5 vs. Crude EVs             | 0.0006      |
|                 | optiprep fraction #13 vs. Crude EVs            | 0.0026      |
|                 |                                                |             |
| Suppl Figure 8B | parental vs. EphrinB1                          | 0.0249      |
|                 | parental vs. DECD                              | 0.2565      |
|                 | parental vs. null2                             | 0.8044      |
|                 | parental vs. null1                             | 0.1107      |
|                 | EphrinB1 vs. DECD                              | 0.2229      |
|                 | EphrinB1 vs. null2                             | 0.0145      |
|                 | EphrinB1 vs. null1                             | 0.0006      |
|                 | DECD vs. null2                                 | 0.1713      |
|                 | DECD vs. null1                                 | 0.0102      |
|                 | null2 vs. null1                                | 0.1716      |

Supplementary Table 8: Comparisons and LSD p values

| Figure             | comparisons           | LSD p value           |        |
|--------------------|-----------------------|-----------------------|--------|
| Suppl Figure 8C    | parental vs. EphrinB1 | 0.0196                |        |
|                    | parental vs. DECD     | 0.5776                |        |
|                    | parental vs. null2    | 0.2406                |        |
|                    | parental vs. null1    | 0.232                 |        |
|                    | EphrinB1 vs. DECD     | 0.0628                |        |
|                    | EphrinB1 vs. null2    | 0.0013                |        |
|                    | EphrinB1 vs. null1    | 0.0012                |        |
|                    | DECD vs. null2        | 0.091                 |        |
|                    | DECD vs. null1        | 0.0872                |        |
|                    | null2 vs. null1       | 0.9818                |        |
|                    |                       |                       |        |
|                    | Suppl Figure 8D       | parental vs. EphrinB1 | 0.001  |
|                    |                       | parental vs. DECD     | 0.4582 |
| parental vs. null2 |                       | 0.2007                |        |
| parental vs. null1 |                       | 0.1738                |        |
| EphrinB1 vs. DECD  |                       | 0.0002                |        |
| EphrinB1 vs. null2 |                       | < 0.0001              |        |
| EphrinB1 vs. null1 |                       | < 0.0001              |        |
| DECD vs. null2     |                       | 0.5772                |        |
| DECD vs. null1     |                       | 0.5207                |        |
| null2 vs. null1    |                       | 0.9315                |        |

## Supplementary Table 9: References for antibodies used for western blot analysis

| <u>Antibody</u>                          | <u>Reference</u>                                                                                             |
|------------------------------------------|--------------------------------------------------------------------------------------------------------------|
| 1) CD9 (Abcam, ab92726)                  | Coulter ME, et al <i>Cell Rep.</i> 24: 973-986 (2018)                                                        |
| 2) CD81(sc-166029, clone B-11)           | Navakanitworakul et al <i>Sci Rep.</i> 6: 25486 (2016)                                                       |
| 3) EphrinB1 (R&D sys AF473)              | Dong, LD et al <i>J Neurosci</i> 35: 5409-21 (2015)                                                          |
| 4) EphrinB1 (LSBio LS-C108001)           | Colbert, PL et al <i>Oncotarget</i> 6: 953-68 (2015)                                                         |
| 5) $\beta$ -III tubulin (Abcam, ab18207) | Ruibin W et al <i>Biomed Pharma</i> 100:349-57 (2018)                                                        |
| 6) GAPDH (Thermo, AM4300)                | Hunter MR, et al <i>Biochem J</i> 474: 3615-26 (2017)                                                        |
| 7) $\beta$ actin (Sigma, A2228)          | Jin, R et al <i>J Cell Sci</i> 127: 3116-30 (2014)                                                           |
| 8) Tau (Abcam, ab75714)                  | Wu, J et al <i>Oncotarget</i> 8: 40843-56 (2017)                                                             |
| 9) P-Erk1/2 (Millipore, ABS44)           | Frank, D et al <i>MBio</i> 9: pii e00782-18 (2018)                                                           |
| 10) TRPV1 (Novus, NB100-98897)           | Issa A, et al <i>Neurosci Lett</i> 519: 26-30 (2012)<br>Chen J, et al <i>Cardio Diabet</i> 14: 22-35 (2015). |

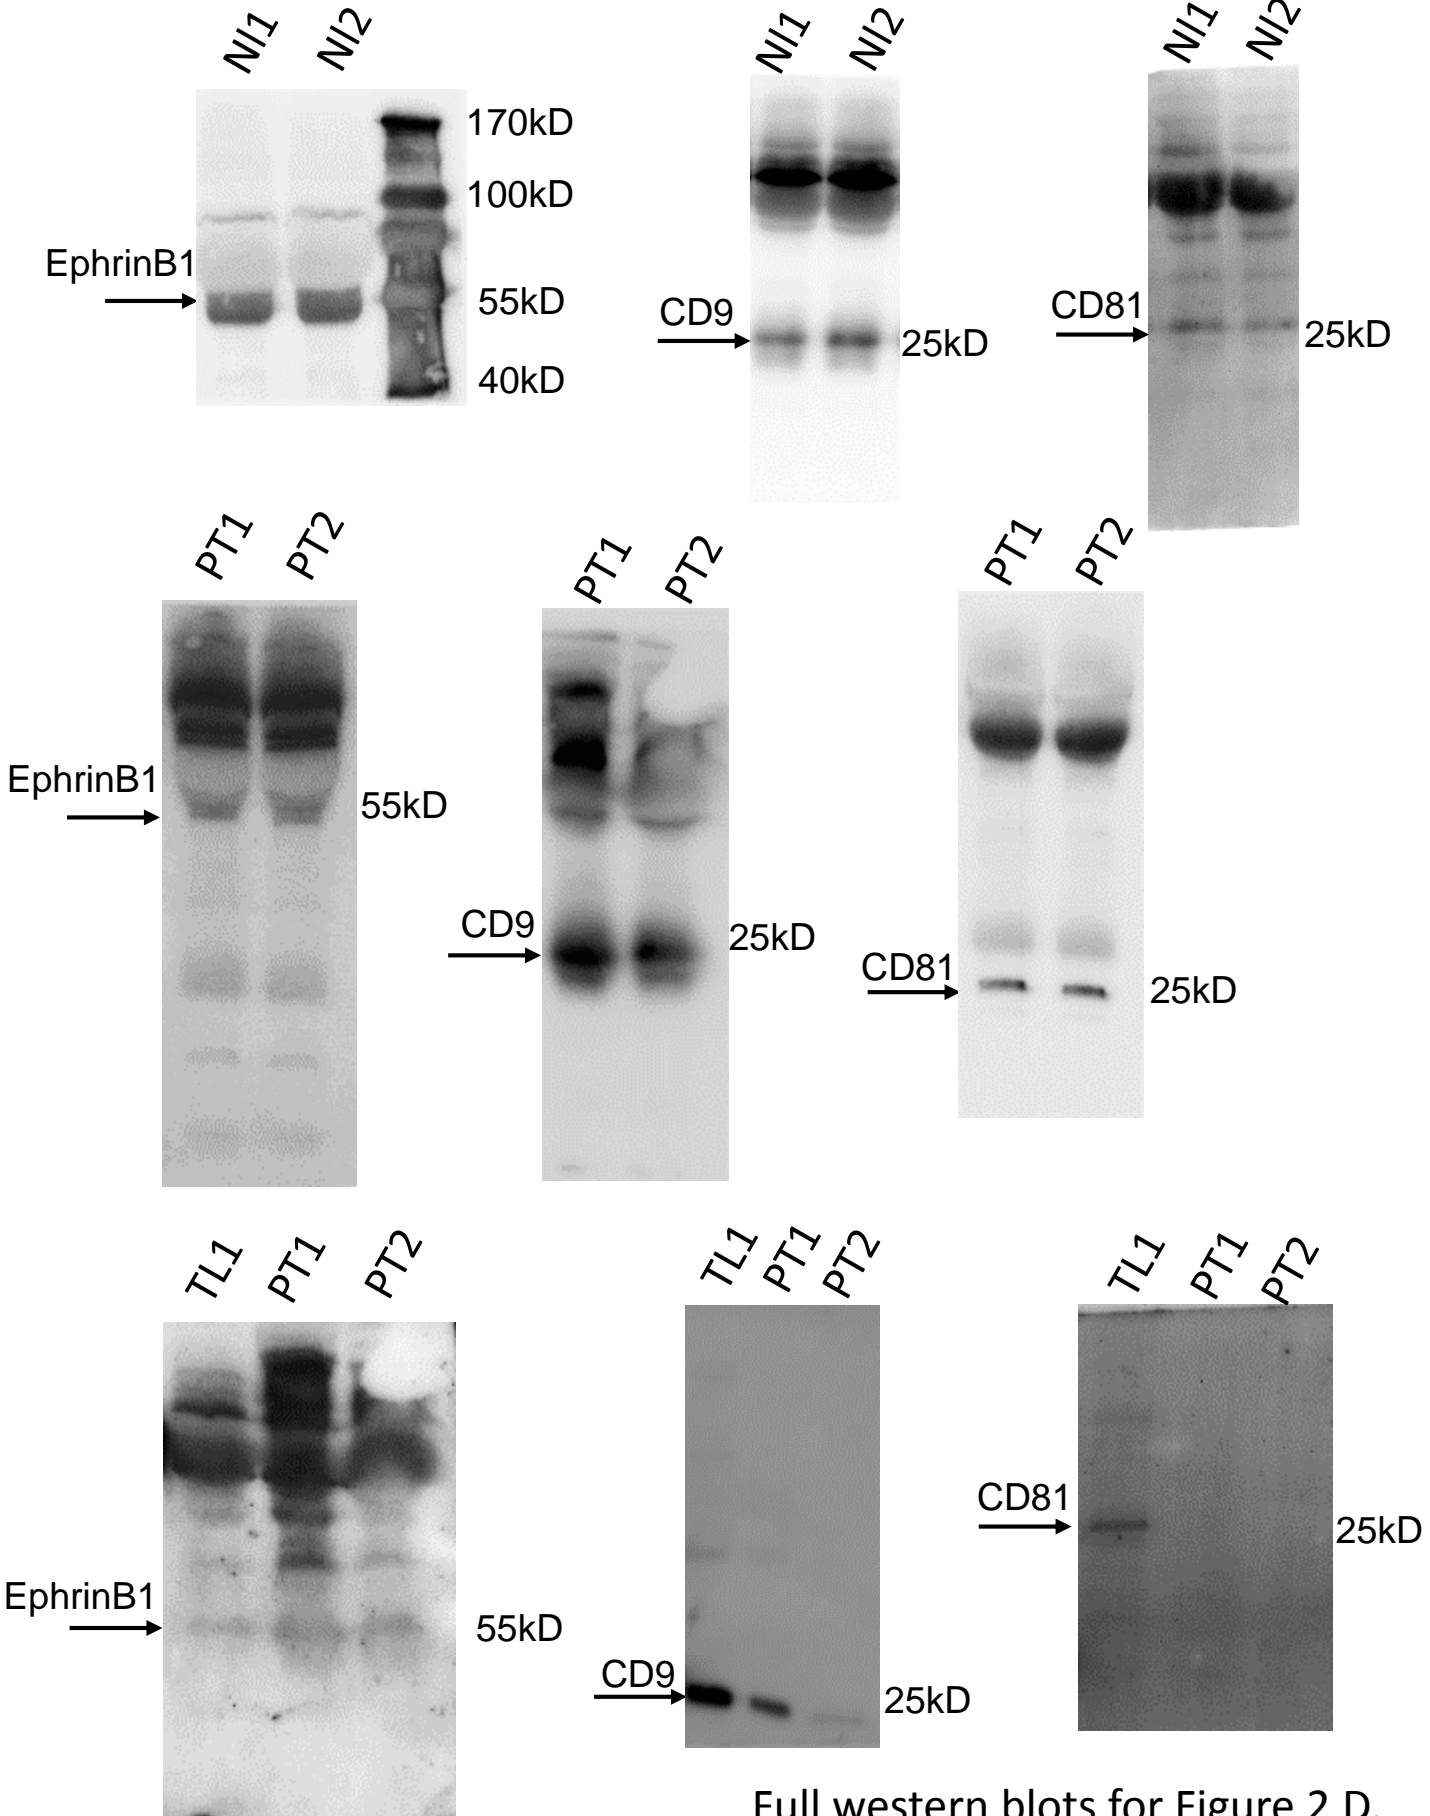

Full western blots for Figure 2 D.

**Supplementary Figure 10**

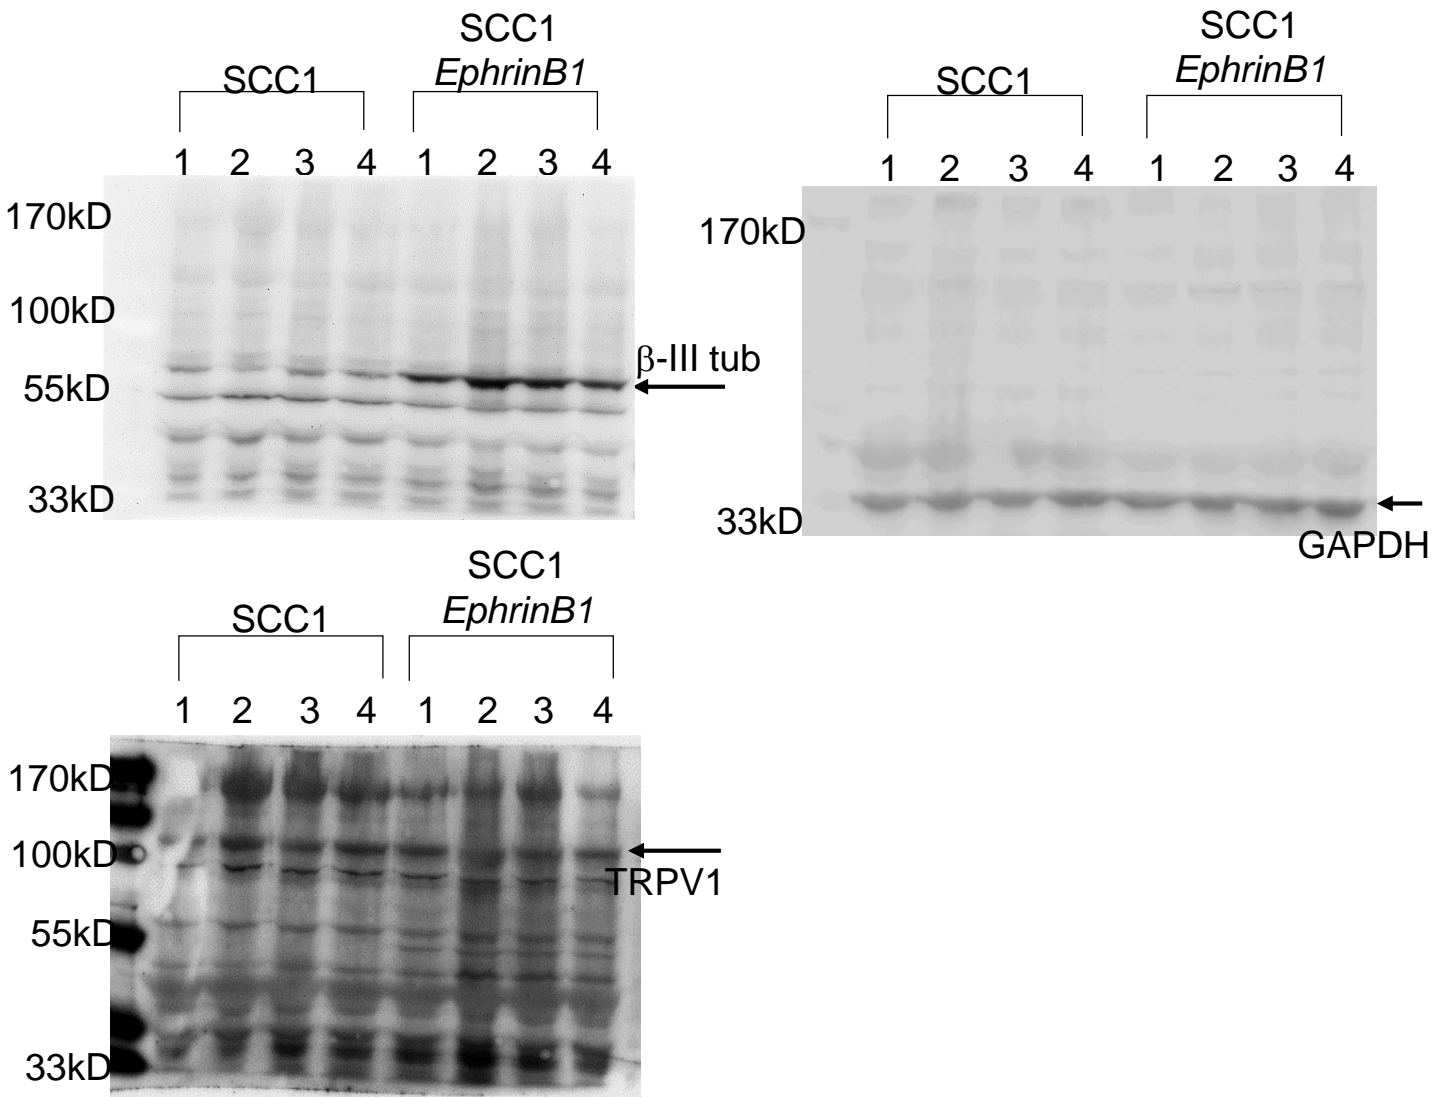

Full western blots for Figure 7 C.

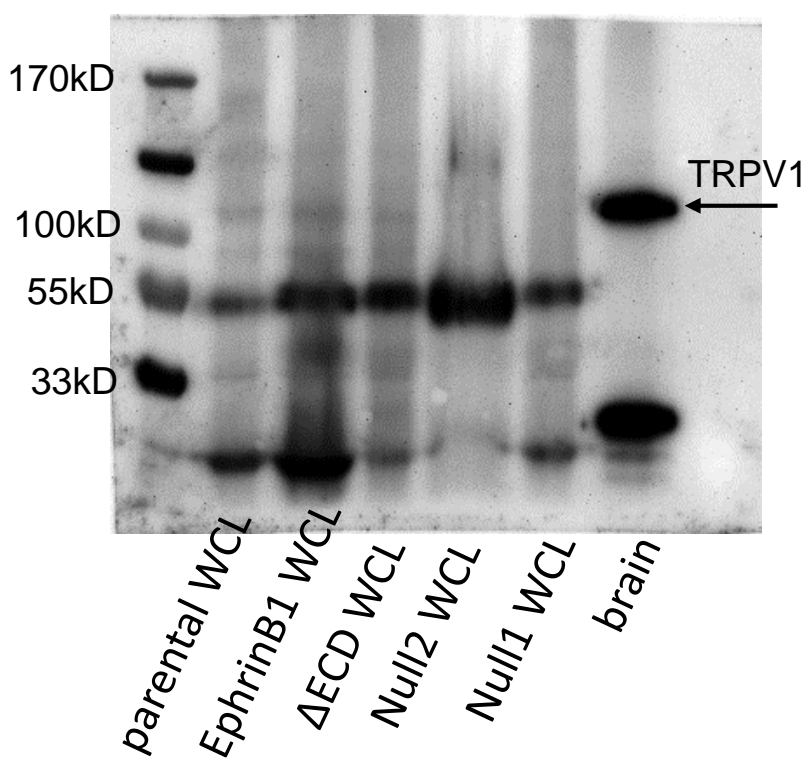

For reference, an additional western in which whole brain lysate was run as a control is included for validation of the TRPV1 band. The samples included with this western blot are whole cell lysates (WCL) from the indicated cell lines. The predicted molecular weight of TRPV1 is approximately 100kD. This is validated in a publication by Chen et al where the 100kD TRPV1 band is eliminated in tissue lysate from TRPV1 knockout mice (*Cardiovascular Diabetology* 14: 22-35 (2015)).

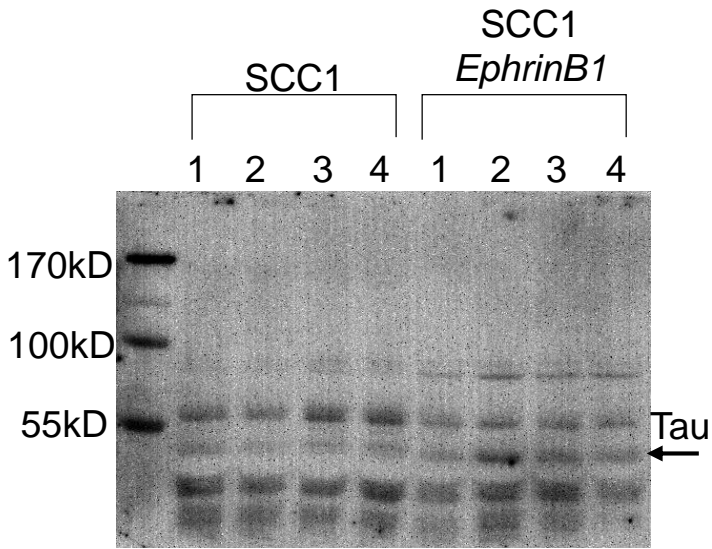

Full western blots for Figure 7 C.

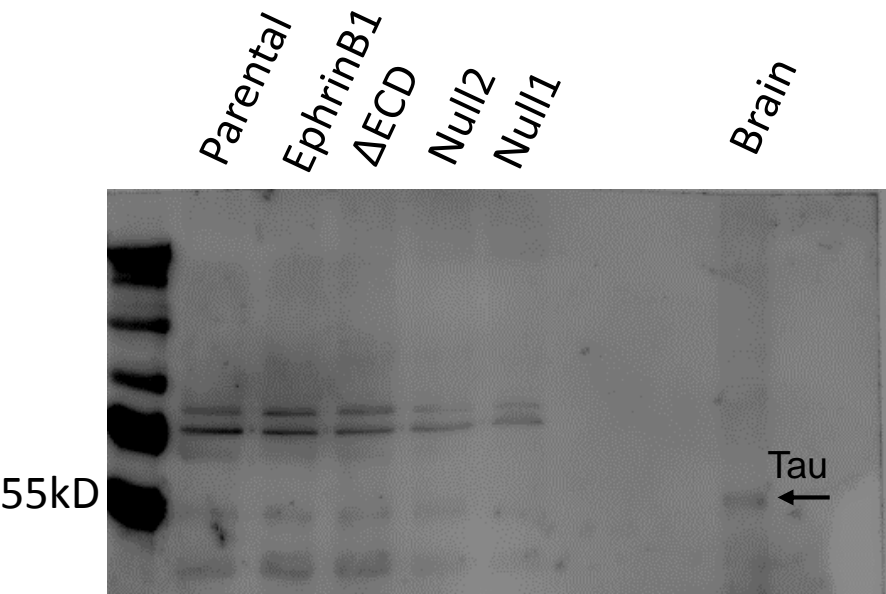

For reference, an additional western in which whole brain lysate was run as a control is included for validation of the Tau band. The samples included with this western blot are whole cell lysates (WCL) from the indicated cell lines.
